# Supplementary material
Source: publisher site journal article supplement (https://www.dovepress.com/article/supplementary_file/582277/582277_Supplementary%20Table.docx)
Supplement: Supplementary file 1 [file 582277_Supplementary%20Table.docx]

**Supplementary Table S1.** Assignment of independent variables

| Variable | Code | Assignment of values |
| --- | --- | --- |
| Age | X₁ | Male = 0; Female = 1. |
| Education level | X2 | Dummy variables were created using Primary education or below as the reference: Primary education or below = 000; Junior high school = 100; High school/vocational school = 010; College or above = 001. |
| Place of residence | X3 | Rural=0; Town=1. |
| Personal monthly income (CNY) | X4 | Dummy-coded using < 3,000 CNY as the reference: < 3000 CNY = 000; 3001-4999 CNY =100; 5000-7999CNY = 010; ≥8,000 CNY = 001. |
| Occupational type | X5 | Administrative, corporate, institutional units=000, Farmer=100, Self-employed=010, Worker=001. |
| Occupational nature | X6 | Dummy-coded using physical work as the reference: Physical work=00, Mental work=10, Mixed work=01. |
| Primary household income source | X7 | No=0, Yes=1. |
| NRS scores | X8 | 1-3=1, 4-6=2. |
| NYHA functional class | X9 | Dummy-coded using Class I as reference: Class I = 00; Class II = 01; Class III = 10 |
| RTW-SE | X10 | Raw values |
| Anxiety | X11 | Raw values |
| Depression | X12 | Raw values |
| BIPQ total score | X13 | Raw values |
| Cognitive representation | X14 | Raw values |
| Emotional representation | X15 | Raw values |
| Comprehension ability | X16 | Raw values |
| SSRS total score | X17 | Raw values |
| Objective support | X18 | Raw values |
| Subjective support | X19 | Raw values |
| Utilization of support | X20 | Raw values |
| Return to work status | Y | Not returned = 0; Returned = 1 |
